# Supplementary material for: Fabrication of magneto-responsive microgears based on magnetic nanoparticle embedded PDMS
Source: Royal Society of Chemistry journal article supplement (doi:10.1039/c4ra05602g), 2014-01-01
Supplement: c4ra05602g2.pdf [file c4ra05602g2.pdf]

### Electronic Supplementary Information 2 (ESI\_2)

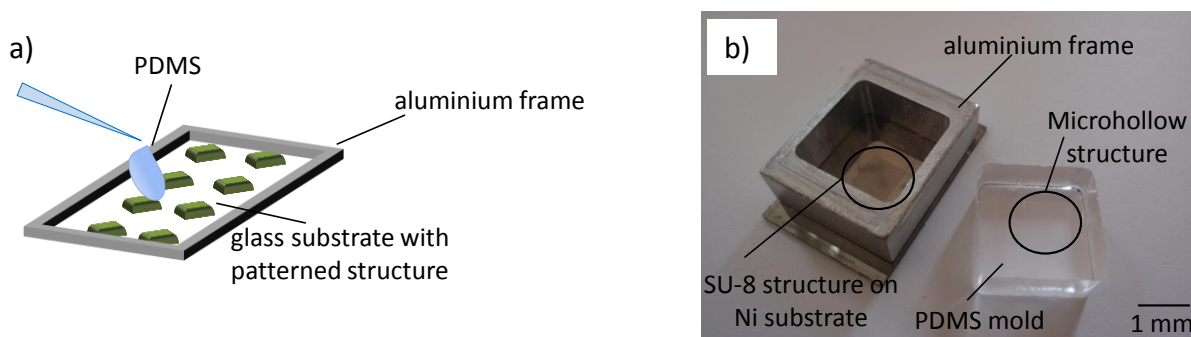

**ESI\_2.** a) The fabrication step where the aluminium frame is used. b) SU-8 master template on a nickel substrate with the aluminium frame on it (left); it was used to produce a cuboidal PDMS mold with the microhollow structure in the center (right).
