# Supplementary material for: Fabrication of magneto-responsive microgears based on magnetic nanoparticle embedded PDMS
Source: Royal Society of Chemistry journal article supplement (doi:10.1039/c4ra05602g), 2014-01-01
Supplement: c4ra05602g4.pdf [file c4ra05602g4.pdf]

#### Electronic Supplementary Information 4 (ESI\_4)

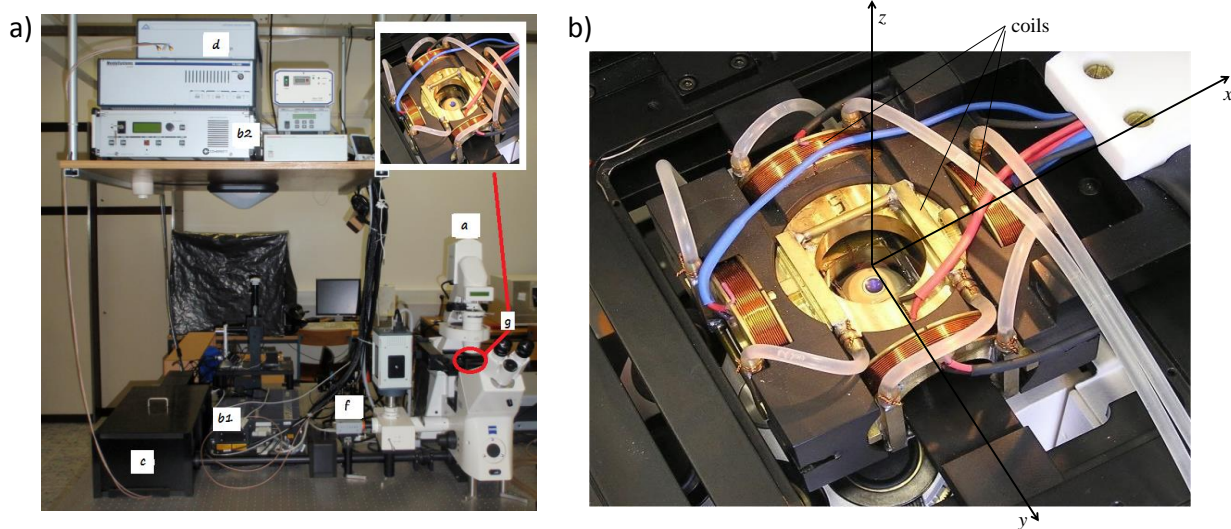

**ESI\_4.** (a) Magneto-optical experimental set-up: (a) microscope, (b1) laser head, (b2) laser diode driver, (c) box with acousto-optic deflectors, (d) beam steering controller, (f) CMOS camera, (g) coils. (b) The magnetic field is generated by three orthogonal pairs of coils in approximately Helmholtz configuration (for x, y and z directions) powered by a 6-channel computer-controlled current source.
