# Supplementary material for: Fabrication of magneto-responsive microgears based on magnetic nanoparticle embedded PDMS
Source: Royal Society of Chemistry journal article supplement (doi:10.1039/c4ra05602g), 2014-01-01
Supplement: c4ra05602g5.pdf [file c4ra05602g5.pdf]

### Electronic Supplementary Information 5 (ESI\_5)

The movies show the rotation of the microgears in an external magnetic field of strength  $B$  and rotation frequency  $f_{\text{field}}$ :

**Movie1:** 9-tooth microgear,  $B = 1 \text{ mT}$ ,  $f_{\text{field}}=0.6 \text{ Hz}$

**Movie2:** 9-tooth microgear,  $B = 1 \text{ mT}$ ,  $f_{\text{field}}=7 \text{ Hz}$

**Movie3:** 9-tooth microgear,  $B = 1.5 \text{ mT}$ ,  $f_{\text{field}}=3 \text{ Hz}$

**Movie4:** 11-tooth microgear,  $B = 2 \text{ mT}$ ,  $f_{\text{field}}=0.6 \text{ Hz}$

**Movie5:** magnetic and non-magnetic microgear,  $B = 1 \text{ mT}$ ,  $f_{\text{field}}=7\text{Hz}$

**Movie6:** magnetic and non-magnetic microgear,  $B = 1 \text{ mT}$ ,  $f_{\text{field}}=20\text{Hz}$

**Movie7:** three microgears,  $B = 1 \text{ mT}$ ,  $f_{\text{field}}=7\text{Hz}$
